# Supplementary material
Source: Research Square preprint supplement (doi:10.21203/rs.3.rs-10163834/v1)
Supplement: Supplementary file 1 [file d78b0022f26eec3199766553.docx]

**Table S1.** Taxonomic identification and GenBank accession numbers of culturable bacterial isolates recovered from soils before cultivation and after legume growth.

| **Treatment &Soils** | **Bacterial strains** | **% Similarity** | **Accession number** |
| --- | --- | --- | --- |
| ***Gingindlovu*** |  |  |  |
| Pre- cultivation | *Enterobacter* sp*.*  *Enterobacter* sp*.* | 97.76  97.87 | PX916018  PX916066 |
| Post- groundnut | *Caballeronia* sp*.*  *Caballeronia* sp*.*  *Paenibacillus* sp.  *Paenibacillus* sp*.* | 96.00  97.10  93.27  93.27 | PX916019  PX916020  PX916050  PX916051 |
| Post- cowpea | *Paraburkholderia* sp.  *Paraburkholderia* sp.  *Paraburkholderia* sp.  *Paenibacillus* sp. (*Bacillaceae*)  *Bacillus* sp.  *Bacillus* sp.  *Bacillus* sp. | 97.10  96.33  97.46  88.49  97.37  97.39  97.39 | PX916021  PX916022  PX916023  PX916051  PX916067  PX916068  PX916069 |
| Post- mungbean | *Brevibacillus* sp.  *Paraburkholderia* sp. | 93.58  95.35 | PX916070  PX916071 |
| ***Mvutshini*** |  |  |  |
| Pre- cultivation | *Pseudomonas* sp.  *Rhizobium* sp.  *Rhizobium* sp.  *Burkholderia* sp.  *Priestia* sp. | 95.20  96.79  98.15  95.24  96.43 | PX916028  PX916029  PX916030  PX916055  PX916072 |
| Post- groundnut | *Enterobacter* sp.  *Novosphingobium* sp. | 84.86  94.05 | PX916056  PX916073 |
| Post- cowpea | *Paraburkholderia* sp.  *Pseudomonas* sp.  *Pseudomonas* sp.  *Pseudomonas* sp.  *Burkholderia* sp.  *Burkholderia* sp.  *Sphinomonas* sp.  *Agrobacterium* sp.  *Novosphingobium* sp. | 97.59  95.27  96.22  97.49  97.14  97.41  97.59  97.59  96.90 | PX916031  PX916032  PX916033  PX916034  PX916057  PX916058  PX916074  PX916075  PX916076 |
| Post- mungbean | *Lysinibacillus* sp.  *Paenibacillus* sp.  *Burkholderia* sp.  *Burkholderia* sp. | 95.66  95.02  96.46  97.25 | PX916035  PX916059  PX916075  PX916076 |
|  |  |  |  |
| ***Mpembeni*** |  |  |  |
| Pre- cultivation | *Pseudomonas* sp.  *Caballeronia* sp.  *Bacillus salipaludis* strain WN066  *Paenibacillus* sp.  Unclasified Gammaproteobacteria | 97.07  96.14  95.95  94.80  94.50 | PX916036  PX916037  PX916038  PX916060  PX916079 |
| Post- groundnut | *Burkholderia* sp. | 99.00 | PX916080 |
| Post- cowpea | *Herbaspirillum* sp.  *Novosphingobium* sp.  *Novosphingobium* sp. | 95.97  97.54  96.67 | PX916039  PX916061  PX916062 |
| Post- mungbean | *Paenibacillus* sp. | 95.02 | PX916063 |
|  |  |  |  |
| ***Hibberdene*** |  |  |  |
| Pre- cultivation | *Pseudomonas* sp. | 93.90 | PX916064 |
| Post- groundnut | *Novosphingobum* sp.  *Novosphingobum* sp. | 96.17  95.09 | PX916040  PX916082 |
| Post- mungbean | *Novosphingobum* sp.  *Novosphingobum* sp. | 96.17  96.17 | PX916041  PX916042 |
| ***Mzinto*** |  |  |  |
| Pre- cultivation | *Pseudomonas* sp.  *Arthrobacter* sp. | 96.82  94.50 | PX916043  PX916085 |
| Post- groundnut | *Pseudomonas* sp.  *Pseudomonas* sp.  *Pseudomonas* sp.  *Burkholderia* sp. | 96.39  96.39  88.35  95.30 | PX916044  PX916045  PX916046  PX916086 |
| Post- cowpea | *Pseudomonas* sp.  *Pseudomonas* sp.  *Pseudomonas* sp. | 97.0  97.0  99.00 | PX916047  PX916048  X916087 |
| Post- mungbean | *Enterobacter* sp.  *Enterobacter* sp. | 95.00  95.00 | PX916088  PX916089 |
